# Supplementary material for: Application of Numerical Groundwater Model to Determine Spatial Configuration of Confining Unit Breaches near a Municipal Well Field in Memphis, Tennessee
Source: Atypon-hosted journal article supplement (doi:10.1061/(asce)he.1943-5584.0002117), 2021-06-30
Supplement: supplemental_materials_he.1943-5584.0002117_torres-uribe.pdf [file supplemental_materials_he.1943-5584.0002117_torres-uribe.pdf]

## SUPPLEMENTAL MATERIALS

*ASCE Journal of Hydrologic Engineering*

# Application of Numerical Groundwater Model to Determine Spatial Configuration of Confining Unit Breaches near a Municipal Well Field in Memphis, Tennessee

Hugo E. Torres-Uribe, Brian Waldron, Daniel Larsen,  
and Scott Schoefernacker

**DOI:** 10.1061/(ASCE)HE.1943-5584.0002117

© ASCE 2021

[www.ascelibrary.org](http://www.ascelibrary.org)

Recent Submissions Search Submissions

**Click** on the search submissions tab, ensure that the search by author box is ticked, enter the author's name on the "Enter criteria:" field, and **click** on the search result.

Search:  Authors

Titles

Keywords

Committee Member

Committee Chair

Major

Search Constraint:  Search Results Contain **All** Words Supplied

Search Results Contain **Any** Word Supplied

Enter Criteria:

Criteria: **Author: Villalpando Vizcaino, Rodrigo**

Click

**Fig. S1.** Step 1 to access the master's thesis by Villalpando-Vizcaíno (2019) on the Electronic Thesis and Dissertation (ETD) Repository by the University of Memphis at <https://umwa.memphis.edu/etd/>.

Recent Submissions

Search Submissions

- Search:
- Authors
  - Titles
  - Keywords
  - Committee Member
  - Committee Chair
  - Major

Click view on the matching thesis submission.

- Search Constraint:
- Search Results Contain **All** Words Supplied
  - Search Results Contain **Any** Word Supplied

Enter Criteria:

Criteria: Villalpando Vizcaino, Rodrigo - [Author]

Matching ETDs...

[View](#)

**Development Of A Numerical Multi-Layered Groundwater Model To Simulate Inter-Aquifer Water Exchange In Shelby County, Tennessee**

*Thesis by Rodrigo Villalpando Vizcaino - Accepted: April 29th 2019*

*Access Level: Unrestricted*

Click

**Fig. S2.** Step 2 to access the master's thesis by Villalpando-Vizcaíno (2019) on the Electronic Thesis and Disertation (ETD) Repository by the University of Memphis at <https://umwa.memphis.edu/etd/>.

[Recent Submissions](#)

[Search Submissions](#)

[Back](#)

**ID:** 6395

**Author:** Villalpando Vizcaino, Rodrigo Mr

**Email Address:** rvlllpnd@memphis.edu

**Degree:** Master of Science

**Major:** Civil Engineering

**Concentration:** Water Resources Engineering

**Type of Entry:** Thesis

**Thesis Title:** Development Of A Numerical Multi-Layered Groundwater Model To Simulate Inter-Aquifer Water Exchange In Shelby County, Tennessee

**Advisory Committee:** Brian Waldron - Member  
Daniel Larsen - Member  
Claudio Ivan Meier - Member

**Keywords:** Groundwater  
MODFLOW  
Water exchange  
Shelby County  
Memphis aquifer  
Leakage  
3D Model  
Inter-aquifer

Click the folder icon in the  
“Main Documents:” field to  
download a PDF version of  
the thesis submission.

**Date of Defense:** 08/10/2018

**Abstract:** Inter-aquifer water exchange between the shallow and Memphis aquifers in Shelby County, Tennessee, poses a contamination threat due to the downward migration of younger, lesser quality groundwater, into deeper, more pristine aquifers. Discontinuities in the protective upper Claiborne confining unit (UCCU) allow for leakage into the Memphis aquifer, a sand-dominated aquifer that provides about 95% of the water used in the Memphis area. A multi-layered 3D groundwater model for Shelby County was created using the United States Geological Survey's MODFLOW-NWT program, to evaluate water exchange for a simulation period from January 2005 to December 2016. Results indicate an overall leakage from the UCCU of 61 m<sup>3</sup>/min into the Memphis aquifer in Shelby County, accounting for 10% of its water budget inflow, with localize areas experiencing as much as 20% water exchange. As young water tends to stay in the upper part of the Memphis aquifer, a higher mixing percentage is expected in that zone. Water budget assessment for the upper 60 m of the Memphis aquifer resulted in leakage representing 29% of the zone inflow, and as much as 53% in certain areas. Inflow from the Fort Pillow aquifer into the Memphis was found to be negligible. More Localized studies must be conducted to understand the location, characteristics, and orientation of the confining unit breaches, as well as the inter-aquifer water interaction.

**Main Documents:**   Development Of A Numerical Multi-Layered Groundwater Model To Simulate Inter-Aquifer Water Exchange In Shelby County, Tennessee

**Supporting Files:**

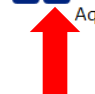

Click

[Back](#)

**Fig. S3.** Step 3 to access the master's thesis by Villalpando-Vizcaíno (2019) on the Electronic Thesis and Dissertation (ETD) Repository by the University of Memphis at <https://umwa.memphis.edu/etd/>.
